---

## Correction

*Resolving the functions of peptidylprolyl isomerases: insights from the mutagenesis of the nuclear FKBP25 enzyme*

Geoff Gudavicius, Heddy Soufari, Santosh Kumar Upadhyay, Cameron D. Mackereth and Christopher J. Nelson

Volume 41 Part 3 (2013) 761–768

In this article, Dr Upadhyay's middle name was omitted. His name should read as given above.
